# Supplementary material
Source: HighWire-hosted journal article supplement (http://cmajopen.ca/highwire/filestream/85265/field_highwire_adjunct_files/0/2020-0157-1-at.pdf)
Supplement: 2020-0157-1-at.pdf [file 2020-0157-1-at.pdf]

## Appendix

### **Long-Term Macrolide Therapy for Chronic Obstructive Pulmonary Disease: A Population-Based Study**

Marie Yan, Farah E. Saxena, Andrew Calzavara, Kevin A. Brown, Gary Garber, Andrea S. Gershon, Jennie Johnstone, Matthew Kumar, Bradley J. Langford, Kevin L. Schwartz, and Nick Daneman

## Data Sources

The Ontario Health Insurance Plan is publicly funded and covers all medically necessary services for residents of the province. The Ontario Drug Benefit program covers prescription medications (including respiratory inhalers) for patients aged 65 and over, and this database has an accuracy exceeding 99% for drugs dispensed by Ontario pharmacies.<sup>1</sup> Four other administrative databases were used for information on demographics, supplemental oxygen use, hospitalizations and emergency department visits. The Registered Persons Database includes patient demographics, such as age, sex, neighbourhood, income quintile and rurality. Information on supplemental oxygen use was obtained from the provincial Assistive Devices Program. The Discharge Abstract Database contains individual-level data for acute, rehabilitation, chronic and day surgery institutions in Ontario.<sup>2</sup> The National Ambulatory Care Reporting System includes patient visits to hospital and community-based ambulatory care (i.e., day surgery, outpatient clinics, and emergency department visits).<sup>3</sup>

**Table S1:** International Classification of Diseases Tenth Revision (ICD-10) codes used for each exclusion criterion, comorbidity, or potential adverse event examined in the study.

| Condition                                                                                    | ICD-10 Codes                                                  |
|----------------------------------------------------------------------------------------------|---------------------------------------------------------------|
| Infection due to other mycobacteria                                                          | A31                                                           |
| Bronchiectasis                                                                               | J47                                                           |
| Ischemic heart disease                                                                       | I20–I25                                                       |
| Pneumonia                                                                                    | J10.0, J11.0, J12–J18                                         |
| Arrhythmias potentially related to macrolide-induced QT prolongation including cardiac death | I46, I49.0, I49.8, I49.9                                      |
| Hearing impairment                                                                           | H90.3, H90.4, H90.5, H90.6, H90.7, H90.8, H91.0, H91.8, H91.9 |
| General adverse medication events and drug allergy                                           | Y40.3, T88.6, T88.7                                           |
| Antibiotic-resistant organisms                                                               | U88, U89                                                      |
| <i>Clostridioides difficile</i> colitis and non-infectious diarrhea                          | A04.7, K52.9                                                  |
| Candidiasis                                                                                  | B37                                                           |

**Figure S1:** Study flow chart.

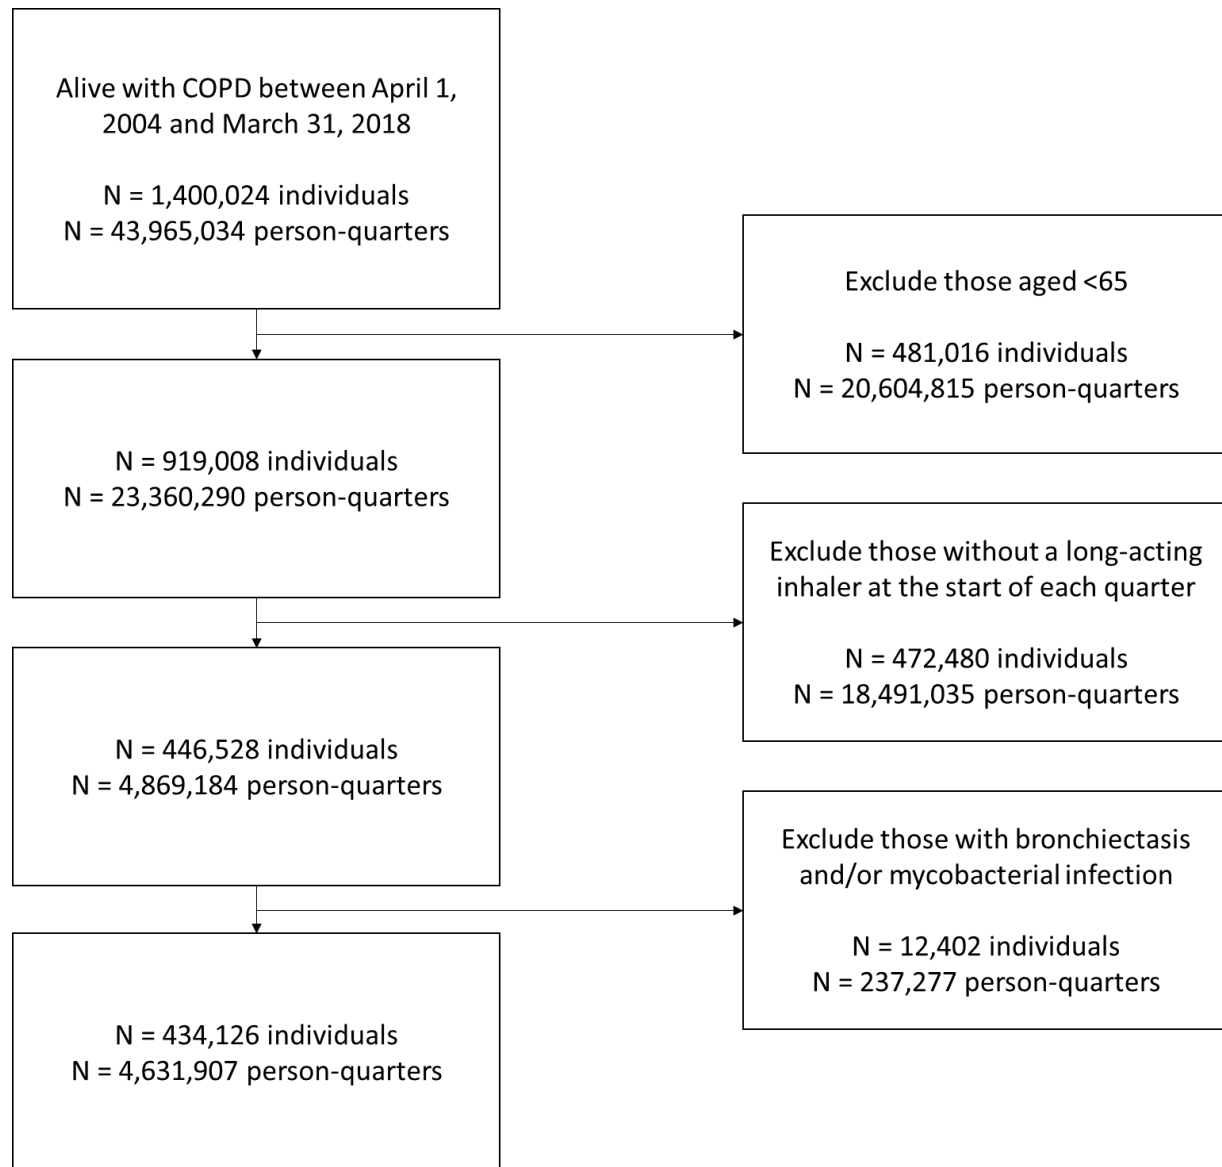

## REFERENCES

1. Levy AR, O'Brien BJ, Sellors C, Grootendorst P, Willison D. Coding accuracy of administrative drug claims in the Ontario Drug Benefit database. *Can J Clin Pharmacol*. 2003;10(2):67–71.
2. Juurlink D, Preyra C, Croxford R, Chong A, Austin P, Tu J, Laupacis A. Canadian Institute for Health Information Discharge Abstract Database: A Validation Study. Toronto: Institute for Clinical Evaluative Sciences; 2006.
3. Canadian Institute for Health Information, Canadian Health Information Management Association. CIHI data quality study of Ontario emergency department visits for 2004-2005: executive summary. [Internet]. Ottawa: Canadian Institute for Health Information; 2007 [cited 2019 Oct 6]. Available from: [http://secure.cihi.ca/cihiweb/products/vol1\\_nacrs\\_executive\\_summary\\_nov2\\_2007.pdf](http://secure.cihi.ca/cihiweb/products/vol1_nacrs_executive_summary_nov2_2007.pdf)
